# Supplementary material for: Whose Cultural Ecosystem Service Values Matter?: Exploring Power Inequities in Diverse Mangrove Communities
Source: Research Square preprint supplement (doi:10.21203/rs.3.rs-2406358/v1), 2023-01-04
Supplement: Supplementary file 1 [file cc19335195015414900ca90f.docx]

| **Identity** | **The signifying qualities of ecological phenomena and how these are enmeshed in processes of identity formation.** |
| --- | --- |
| Rootedness | A connection to an ancestral home; feeling grounded, and established in a location through family and historical ties |
| Sense of Space | Feeling as though a location has a deeper symbolic meaning; feeling bonded to an environment through appreciation for aesthetic traits |
| Belonging | Feeling that you're a part of a community that is bigger than your individual self, to be rightly placed and welcomed |
| Spirituality | The quality of believing in something greater than yourself |
| **Experiences** | **The way ecological phenomena are encountered and understood through events. Experiences are benefits felt mentally or physically through contact with ecosystems.** |
| Tranquility | State of being tranquil, feelings of calmness, peacefulness, quiet, serenity |
| Inspiration | A force of influence that causes creativity, feeling desire to take action |
| Escape | The act of leaving one situation in hopes of achieving tranquility, rest, freedom, or happiness; disconnecting from reality |
| Discovery | An experience centered around exploration; finding and learning for the first time |
| **Capabilities** | **The role that ecological phenomena play in shaping individual and social capacities to understand and do things.** |
| Knowledge | Facts, information, and skills acquired through experience; awareness or familiarity gained through experience |
| Health | Physical wellbeing |
| Dexterity | Skill with hand and feet movement; athletic ability |
| Judgment | The ability to make responsible decisions formulated from past experiences |
| **Equity and Power** | **The co-evolution of authority and development that determines the power relations and inequity in an area.** |
| Governance/Inclusivity | How power relations underpin the governance and institutions that determine access to and control over ecosystem services, ability for all to have equal access to an asset |
| Labor Relations | Relations between humans and nature that co-produces goods and services in a manner that impacts both human and environmental wellbeing |
| Historical Context | The historical co-evolution of power relations and environmental change in shaping ecosystem services values |

**Table 1** Operational definitions of each identified pillar and sub-pillar. Definitions extrapolated from Fish et al. 2016 (blue), and Berbés-Blázquez et al. 2016 (orange)
